# Supplementary material for: Phylogenetic Relatedness Among Plasmids Harbored by Campylobacter jejuni and Campylobacter coli Isolated From Retail Meats
Source: Front Microbiol. 2018 Sep 12;9:2167. doi: 10.3389/fmicb.2018.02167 (PMC6145009; doi:10.3389/fmicb.2018.02167)
Supplement: Supplementary file 6 [file Table_6.XLSX]

## Sheet: Core genome for pVir plasmids
Supplementary Table 6: Core genome analysis of pVir plasmids from Campylobacter jejuni and Campylobacter coli avialable in Genbank (03/24/2018). Analysis was done with Gview server (https://server.gview.ca) using CDS feature of Genbank files of plasmids.
Reference Sequence ID	File	Start	End	Product	Hit Sequence ID	Hit File	Hit Locus	Hit Start	Hit End	Hit Gene	Hit Product	Percent Identity
CP014746.1	pCJDM67S	86	319	hypothetical protein	CP001877	pVir_plasmid_complete_file	CJSA_pVir0023	15783	16016		hypothetical protein	100
					CP010074	pVir_plasmid_complete_file	PJ19_09760	21314	21547		hypothetical protein	100
					CP000550	pVir_plasmid_complete_file	CJJ81176_pVir0024	15919	16152		conserved hypothetical protein	100
					AF226280	pVir_plasmid_complete_file		15919	16152	Cjp24	unknown	100
					CP007184	pVir_plasmid_complete_file	YSQ_09950	2664	2897		hypothetical protein	99.57
					CP013734	pVir_plasmid_complete_file	ATE51_05028	17569	17802		hypothetical protein	99.57
CP014746.1	pCJDM67S	388	711	hypothetical protein	CP007184	pVir_plasmid_complete_file	YSQ_09955	2941	3276		hypothetical protein	96.13
					CP013734	pVir_plasmid_complete_file	ATE51_05018	13877	14212		hypothetical protein	98.92
					CP001877	pVir_plasmid_complete_file	CJSA_pVir0022	15391	15714		hypothetical protein	100
					CP000550	pVir_plasmid_complete_file	CJJ81176_pVir0023	15527	15850		conserved hypothetical protein	100
					AF226280	pVir_plasmid_complete_file		15527	15850	Cjp23	unknown	100
					CP010074	pVir_plasmid_complete_file	PJ19_09755	20922	21245		hypothetical protein	100
CP014746.1	pCJDM67S	722	1129	hypothetical protein	CP013734	pVir_plasmid_complete_file	ATE51_05022	15457	15831		hypothetical protein	96.15
					CP001877	pVir_plasmid_complete_file	CJSA_pVir0021	14973	15380		hypothetical protein	99.26
					CP013734	pVir_plasmid_complete_file	ATE51_05017	13460	13867		hypothetical protein	95.34
					CP010074	pVir_plasmid_complete_file	PJ19_09750	20504	20911		hypothetical protein	100
					CP007184	pVir_plasmid_complete_file	YSQ_09965	3673	4056		hypothetical protein	96.15
					CP000550	pVir_plasmid_complete_file	CJJ81176_pVir0022	15109	15516		conserved hypothetical protein	100
					AF226280	pVir_plasmid_complete_file		15110	15523	Cjp22	unknown	99.75
CP014746.1	pCJDM67S	1536	2096	Hypothetical protein pVir0019/pVir0020	CP000550	pVir_plasmid_complete_file	CJJ81176_pVir0020	14157	14702		conserved hypothetical protein	97.33
					AF226280	pVir_plasmid_complete_file		14158	14703	Cjp20	unknown	97.33
					AF226280	pVir_plasmid_complete_file		14067	14267	Cjp19	unknown	100
					CP010074	pVir_plasmid_complete_file	PJ19_09740	19627	20097		hypothetical protein	96.91
					CP007184	pVir_plasmid_complete_file	YSQ_09975	4658	5131		hypothetical protein	95.28
					CP010074	pVir_plasmid_complete_file	PJ19_09735	19449	19661		hypothetical protein	100
					CP013734	pVir_plasmid_complete_file	ATE51_05016	12902	13375		hypothetical protein	95.36
					CP001877	pVir_plasmid_complete_file	CJSA_pVir0019	14036	14566		hypothetical protein	94.65
CP014746.1	pCJDM67S	3912	4370	Single-stranded DNA-binding protein	CP000550	pVir_plasmid_complete_file	CJJ81176_pVir0014	11732	12190		Ssb	100
					CP013734	pVir_plasmid_complete_file	ATE51_05015	12364	12822	ssb	Single-stranded DNA-binding protein	99.13
					CP001877	pVir_plasmid_complete_file	CJSA_pVir0014	11762	12220	ssb	putative single stranded DNA binding protein	100
					CP007184	pVir_plasmid_complete_file	YSQ_09985	5528	5986		single-stranded DNA-binding protein	99.13
					AF226280	pVir_plasmid_complete_file		11733	12191	ssb	Ssb	100
					CP010074	pVir_plasmid_complete_file	PJ19_09715	17278	17736		single-stranded DNA-binding protein	100
CP014746.1	pCJDM67S	4386	4751	Hypothetical protein pVir0012	CP007184	pVir_plasmid_complete_file	YSQ_09990	5991	6368		hypothetical protein	99.73
					CP010074	pVir_plasmid_complete_file	PJ19_09710	16897	17262		hypothetical protein	100
					CP000550	pVir_plasmid_complete_file	CJJ81176_pVir0013	11351	11716		conserved hypothetical protein	100
					AF226280	pVir_plasmid_complete_file		11352	11717	Cjp12	unknown	100
					CP013734	pVir_plasmid_complete_file	ATE51_05014	11982	12359		hypothetical protein	99.46
					CP001877	pVir_plasmid_complete_file	CJSA_pVir0013	11381	11746		hypothetical protein	100
CP014746.1	pCJDM67S	4952	6919	DNA topoisomerase I (EC 5.99.1.2)	CP007184	pVir_plasmid_complete_file	YSQ_09995	6576	8549		DNA topoisomerase I	95.14
					CP000550	pVir_plasmid_complete_file	CJJ81176_pVir0012	9177	11144		DNA topoisomerase I	99.9
					CP013734	pVir_plasmid_complete_file	ATE51_05013	9806	11773	topA	DNA topoisomerase 1	99.49
					AF226280	pVir_plasmid_complete_file		9178	11145	topA	TopA	99.9
					CP001877	pVir_plasmid_complete_file	CJSA_pVir0012	9207	11174	topA	DNA topoisomerase I	99.95
					CP010074	pVir_plasmid_complete_file	PJ19_09705	14723	16690		DNA topoisomerase I	99.95
CP014746.1	pCJDM67S	6941	8089	Hypothetical protein pVir0010	AF226280	pVir_plasmid_complete_file		8008	9156	Cjp10	unknown	96.69
					CP010074	pVir_plasmid_complete_file	PJ19_09700	13553	14701		hypothetical protein	96.69
					CP000550	pVir_plasmid_complete_file	CJJ81176_pVir0011	8007	9155		conserved hypothetical protein	96.69
					CP001877	pVir_plasmid_complete_file	CJSA_pVir0011	8037	9185		hypothetical protein	99.91
					CP007184	pVir_plasmid_complete_file	YSQ_10000	8571	9719		hypothetical protein	95.91
					CP013734	pVir_plasmid_complete_file	ATE51_05012	8637	9785		TrbL/VirB6 plasmid conjugal transfer protein	96.26
CP014746.1	pCJDM67S	8099	8368	Hypothetical protein pVir0009	AF226280	pVir_plasmid_complete_file		7852	7998	Cjp09	unknown	99.32
					CP007184	pVir_plasmid_complete_file	YSQ_10005	9729	9998		hypothetical protein	95.93
					CP010074	pVir_plasmid_complete_file	PJ19_09695	13274	13543		hypothetical protein	99.63
					CP013734	pVir_plasmid_complete_file	ATE51_05011	8358	8627		hypothetical protein	99.63
					CP001877	pVir_plasmid_complete_file	CJSA_pVir0010	7758	8027		hypothetical protein	100
					CP000550	pVir_plasmid_complete_file	CJJ81176_pVir0010	7728	7997		conserved hypothetical protein	99.63
CP014746.1	pCJDM67S	8510	9391	Hypothetical protein pVir0008	CP010074	pVir_plasmid_complete_file	PJ19_09690	12278	13129		hypothetical protein	99.18
					CP007184	pVir_plasmid_complete_file	YSQ_10010	10141	11022		hypothetical protein	92.74
					CP001877	pVir_plasmid_complete_file	CJSA_pVir0009	6735	7616		hypothetical protein	100
					CP000550	pVir_plasmid_complete_file	CJJ81176_pVir0009	6702	7583		conserved hypothetical protein	99.21
					CP013734	pVir_plasmid_complete_file	ATE51_05010	7334	8215		hypothetical protein	98.75
					AF226280	pVir_plasmid_complete_file		6702	7583	Cjp08	unknown	99.21
CP014746.1	pCJDM67S	9762	10913	FIG00469919: hypothetical protein	CP000550	pVir_plasmid_complete_file	CJJ81176_pVir0007	4452	6338		VirD4	92.66
					CP007184	pVir_plasmid_complete_file	YSQ_10020	11377	13263		hypothetical protein	90.83
					CP001877	pVir_plasmid_complete_file	CJSA_pVir0007	4449	6359	virD4	VirD4	92.66
					CP013734	pVir_plasmid_complete_file	ATE51_05008	5090	6976	traG	Conjugal transfer protein TraG	92.66
					CP010074	pVir_plasmid_complete_file	PJ19_09685	9998	11884		hypothetical protein	92.66
					AF226280	pVir_plasmid_complete_file		4452	6338	virD4	VirD4	92.66
CP014746.1	pCJDM67S	10942	12846	FIG00469919: hypothetical protein	AF226280	pVir_plasmid_complete_file		4452	6338	virD4	VirD4	98.48
					CP010074	pVir_plasmid_complete_file	PJ19_09685	9998	11884		hypothetical protein	98.48
					CP007184	pVir_plasmid_complete_file	YSQ_10020	11377	13263		hypothetical protein	98.21
					CP000550	pVir_plasmid_complete_file	CJJ81176_pVir0007	4452	6338		VirD4	98.48
					CP001877	pVir_plasmid_complete_file	CJSA_pVir0007	4449	6359	virD4	VirD4	98.8
					CP013734	pVir_plasmid_complete_file	ATE51_05008	5090	6976	traG	Conjugal transfer protein TraG	98.21
CP014746.1	pCJDM67S	13260	14210	Type II/IV secretion system ATP hydrolase TadA/VirB11/CpaF, TadA subfamily	CP013734	pVir_plasmid_complete_file	ATE51_05006	3693	4676		Type IV secretion system protein VirB11	96.51
					CP000550	pVir_plasmid_complete_file	CJJ81176_pVir0005	3085	4038	trbB	conjugative transfer regulon protein	98.94
					CP010074	pVir_plasmid_complete_file	PJ19_09675	8631	9584		conjugal transfer protein	99.05
					CP001877	pVir_plasmid_complete_file	CJSA_pVir0005	3085	4035	trbB	conjugative transfer regulon protein	99.68
					CP007184	pVir_plasmid_complete_file	YSQ_10030	13677	14630		conjugal transfer protein	94.4
					AF226280	pVir_plasmid_complete_file		3085	4038	virB11	VirB11	98.94
CP014746.1	pCJDM67S	14414	15550	Type IV secretion/competence protein (VirB10)	CP010074	pVir_plasmid_complete_file	PJ19_09665	7291	8427		hypothetical protein	98.77
					CP001877	pVir_plasmid_complete_file	CJSA_pVir0003	1745	2881	virB10	VirB10	100
					CP007184	pVir_plasmid_complete_file	YSQ_10040	14843	15964		hypothetical protein	94.9
					AF226280	pVir_plasmid_complete_file		1745	2881	virB10	VirB10	98.77
					CP000550	pVir_plasmid_complete_file	CJJ81176_pVir0003	1745	2881		VirB10	98.77
					CP013734	pVir_plasmid_complete_file	ATE51_05003	1745	2866		Type IV secretion system protein virB10	97.33
CP014746.1	pCJDM67S	15547	16617	Type IV secretion/competence protein (VirB9)	CP010074	pVir_plasmid_complete_file	PJ19_09660	6224	7294		Type IV secretion/competence protein (VirB9)	98.13
					CP001877	pVir_plasmid_complete_file	CJSA_pVir0002	678	1748	virB9	VirB9	100
					CP013734	pVir_plasmid_complete_file	ATE51_05002	678	1748		Conjugal transfer protein	97.85
					CP007184	pVir_plasmid_complete_file	YSQ_10045	15961	17034		hypothetical protein	91.56
					AF226280	pVir_plasmid_complete_file		678	1748	virB9	VirB9	98.13
					CP000550	pVir_plasmid_complete_file	CJJ81176_pVir0002	678	1748		VirB9	98.13
CP014746.1	pCJDM67S	16617	17294	DNA transformation competancy	CP000550	pVir_plasmid_complete_file	CJJ81176_pVir0001	1	678		VirB8	99.85
					CP013734	pVir_plasmid_complete_file	ATE51_05001	1	678		VirB8 protein	92.63
					CP007184	pVir_plasmid_complete_file	YSQ_10050	17034	17711		hypothetical protein	94.69
					AF226280	pVir_plasmid_complete_file		1	678	virB8	VirB8	99.85
					CP010074	pVir_plasmid_complete_file	PJ19_09655	5547	6224		virulence protein	99.85
					CP001877	pVir_plasmid_complete_file	CJSA_pVir0001	1	678	virB8	VirB8	100
CP014746.1	pCJDM67S	17438	19906	ATPase required for both assembly of type IV secretion complex and secretion of T-DNA complex, VirB4	CP013734	pVir_plasmid_complete_file	ATE51_05052	34802	37252	virB4	Type IV secretion system protein virB4	96.64
					CP001877	pVir_plasmid_complete_file	CJSA_pVir0052	34563	37031	virB4	VirB4	99.27
					CP000550	pVir_plasmid_complete_file	CJJ81176_pVir0053	34862	37330		VirB4	99.39
					CP007184	pVir_plasmid_complete_file	YSQ_10060	17856	20324		ATPase AAA	92.06
					AF226280	pVir_plasmid_complete_file		34857	37325	virB4	VirB4	99.39
					CP010074	pVir_plasmid_complete_file	PJ19_09650	2935	5403		ATPase AAA	99.39
CP014746.1	pCJDM67S	19916	20158	hypothetical protein	CP007184	pVir_plasmid_complete_file	YSQ_10065	20334	20576		hypothetical protein	94.54
					CP010074	pVir_plasmid_complete_file	PJ19_09645	2683	2925		hypothetical protein	100
					CP013734	pVir_plasmid_complete_file	ATE51_05051	34550	34792		hypothetical protein	95.45
					CP000550	pVir_plasmid_complete_file	CJJ81176_pVir0052	34610	34852		conserved hypothetical protein	100
					AF226280	pVir_plasmid_complete_file		34605	34847	Cjp52	unknown	100
					CP001877	pVir_plasmid_complete_file	CJSA_pVir0051	34311	34553		hypothetical protein	100
CP014746.1	pCJDM67S	20158	20463	hypothetical protein	CP000550	pVir_plasmid_complete_file	CJJ81176_pVir0051	34305	34610		conserved hypothetical protein	99.67
					CP007184	pVir_plasmid_complete_file	YSQ_10070	20576	20884		hypothetical protein	86.61
					CP001877	pVir_plasmid_complete_file	CJSA_pVir0050	34006	34311		hypothetical protein	99.35
					CP013734	pVir_plasmid_complete_file	ATE51_05050	34248	34550		hypothetical protein	99.22
					AF226280	pVir_plasmid_complete_file		34468	34605	Cjp51	unknown	99.28
					CP010074	pVir_plasmid_complete_file	PJ19_09640	2378	2683		hypothetical protein	99.67
CP014746.1	pCJDM67S	21294	22865	FIG00470017: hypothetical protein	AF226280	pVir_plasmid_complete_file		31899	33251	Cjp49	unknown	98.97
					CP007184	pVir_plasmid_complete_file	YSQ_10075	21569	23140		relaxase	95.87
					CP010074	pVir_plasmid_complete_file	PJ19_09635	21	1592		relaxase	99.62
					CP013734	pVir_plasmid_complete_file	ATE51_05049	31855	33426		Relaxase/mobilization nuclease domain protein	99.49
					CP000550	pVir_plasmid_complete_file	CJJ81176_pVir0049	31903	33474		conserved hypothetical protein	99.11
					CP001877	pVir_plasmid_complete_file	CJSA_pVir0048	31657	33228		putative relaxase	99.75
CP014746.1	pCJDM67S	23092	23484	FIG00638667: hypothetical protein	CP000550	pVir_plasmid_complete_file	CJJ81176_pVir0048	31284	31676		conserved hypothetical protein	92.11
					AF226280	pVir_plasmid_complete_file		31280	31672	Cjp48	unknown	92.11
					CP007184	pVir_plasmid_complete_file	YSQ_10080	23367	23759		hypothetical protein	92.37
					CP010074	pVir_plasmid_complete_file	PJ19_09865	36006	36398		hypothetical protein	92.37
					CP013734	pVir_plasmid_complete_file	ATE51_05048	31236	31628		hypothetical protein	92.88
					CP001877	pVir_plasmid_complete_file	CJSA_pVir0047	31038	31430		putative lipoprotein	99.49
CP014746.1	pCJDM67S	24371	24733	hypothetical protein	AF226280	pVir_plasmid_complete_file		30035	30397	Cjp46	unknown	99.72
					CP000550	pVir_plasmid_complete_file	CJJ81176_pVir0046	30039	30401		conserved hypothetical protein	99.72
					CP013734	pVir_plasmid_complete_file	ATE51_05045	29973	30344		hypothetical protein	88.44
					CP007184	pVir_plasmid_complete_file	YSQ_10095	24653	25015		hypothetical protein	99.45
					CP010074	pVir_plasmid_complete_file	PJ19_09855	34752	35114		hypothetical protein	100
					CP001877	pVir_plasmid_complete_file	CJSA_pVir0044	29789	30151		hypothetical protein	99.72
CP014746.1	pCJDM67S	25246	25677	hypothetical protein	CP001877	pVir_plasmid_complete_file	CJSA_pVir0039	27417	27848		hypothetical protein	98.38
					CP000550	pVir_plasmid_complete_file	CJJ81176_pVir0040	27489	27920		conserved hypothetical protein	98.38
					CP013734	pVir_plasmid_complete_file	ATE51_05043	28977	29408		hypothetical protein	98.61
					CP007184	pVir_plasmid_complete_file	YSQ_10110	26072	26503		hypothetical protein	98.38
					AF226280	pVir_plasmid_complete_file		27485	27916	Cjp40	unknown	98.38
					CP010074	pVir_plasmid_complete_file	PJ19_09835	32856	33287		hypothetical protein	98.38
CP014746.1	pCJDM67S	25674	26084	hypothetical protein	CP001877	pVir_plasmid_complete_file	CJSA_pVir0038	27010	27420		hypothetical protein	92.42
					CP013734	pVir_plasmid_complete_file	ATE51_05042	28556	28990		hypothetical protein	89.5
					CP007184	pVir_plasmid_complete_file	YSQ_10115	26500	26916		hypothetical protein	93.45
					CP000550	pVir_plasmid_complete_file	CJJ81176_pVir0039	27082	27492		conserved hypothetical protein	92.42
					AF226280	pVir_plasmid_complete_file		27078	27488	Cjp39	unknown	92.42
					CP010074	pVir_plasmid_complete_file	PJ19_09830	32449	32859		hypothetical protein	92.42
CP014746.1	pCJDM67S	26332	26640	hypothetical protein	CP007184	pVir_plasmid_complete_file	YSQ_10130	27682	27987		hypothetical protein	97.21
					AF226280	pVir_plasmid_complete_file		26059	26367	Cjp36	unknown	99.03
					CP001877	pVir_plasmid_complete_file	CJSA_pVir0035	25990	26298		hypothetical protein	99.03
					CP013734	pVir_plasmid_complete_file	ATE51_05040	27958	28263		hypothetical protein	97.56
					CP000550	pVir_plasmid_complete_file	CJJ81176_pVir0036	26062	26370		conserved hypothetical protein	99.03
					CP010074	pVir_plasmid_complete_file	PJ19_09815	31429	31737		hypothetical protein	99.03
CP014746.1	pCJDM67S	26654	26998	hypothetical protein	CP013734	pVir_plasmid_complete_file	ATE51_05039	27600	27944		hypothetical protein	100
					CP000550	pVir_plasmid_complete_file	CJJ81176_pVir0035	25704	26048		conserved hypothetical protein	99.71
					CP010074	pVir_plasmid_complete_file	PJ19_09810	31071	31415		hypothetical protein	99.71
					AF226280	pVir_plasmid_complete_file		25701	26045	Cjp35	unknown	99.71
					CP001877	pVir_plasmid_complete_file	CJSA_pVir0034	25632	25976		hypothetical protein	99.71
					CP007184	pVir_plasmid_complete_file	YSQ_10135	28001	28345		hypothetical protein	99.71
CP014746.1	pCJDM67S	27470	27898	FIG00472444: hypothetical protein	CP000550	pVir_plasmid_complete_file	CJJ81176_pVir0033	24799	25227		conserved hypothetical protein	98.37
					AF226280	pVir_plasmid_complete_file		24798	25226	Cjp34	unknown	98.37
					CP010074	pVir_plasmid_complete_file	PJ19_09805	30187	30612		hypothetical protein	93.24
					CP007184	pVir_plasmid_complete_file	YSQ_10140	28806	29234		hypothetical protein	95.34
					CP013734	pVir_plasmid_complete_file	ATE51_05038	26701	27129		hypothetical protein	96.5
					CP001877	pVir_plasmid_complete_file	CJSA_pVir0032	24733	25161		hypothetical protein	98.6
CP014746.1	pCJDM67S	29136	29855	FIG00472140: hypothetical protein	AF226280	pVir_plasmid_complete_file		22842	23561	Cjp32	unknown	99.17
					CP010074	pVir_plasmid_complete_file	PJ19_09795	28209	28949		hypothetical protein	96.9
					CP001877	pVir_plasmid_complete_file	CJSA_pVir0030	22777	23496		hypothetical protein	99.58
					CP007184	pVir_plasmid_complete_file	YSQ_10150	30472	31212		hypothetical protein	96.09
					CP000550	pVir_plasmid_complete_file	CJJ81176_pVir0031	22843	23562		conserved hypothetical protein	99.17
					CP013734	pVir_plasmid_complete_file	ATE51_05036	24660	25463		hypothetical protein	97.2
CP014746.1	pCJDM67S	29886	30668	IncQ plasmid conjugative transfer protein TraQ (RP4 TrbM homolog)	CP007184	pVir_plasmid_complete_file	YSQ_10155	31240	32025		hypothetical protein	98.72
					CP013734	pVir_plasmid_complete_file	ATE51_05035	23845	24627		TrbM	98.98
					CP010074	pVir_plasmid_complete_file	PJ19_09790	27396	28178		hypothetical protein	100
					CP000550	pVir_plasmid_complete_file	CJJ81176_pVir0030	22030	22812		cpp45	99.87
					CP001877	pVir_plasmid_complete_file	CJSA_pVir0029	21964	22746		TrbM-like protein	99.87
					AF226280	pVir_plasmid_complete_file		22029	22811	Cjp31		99.87
CP014746.1	pCJDM67S	30772	31728	FIG00470162: hypothetical protein	CP013734	pVir_plasmid_complete_file	ATE51_05034	22774	23730		hypothetical protein	99.79
					CP010074	pVir_plasmid_complete_file	PJ19_09785	26336	27292		hypothetical protein	99.69
					CP007184	pVir_plasmid_complete_file	YSQ_10160	32129	33082		hypothetical protein	99.58
					CP001877	pVir_plasmid_complete_file	CJSA_pVir0028	20904	21860		hypothetical protein	98.96
					CP000550	pVir_plasmid_complete_file	CJJ81176_pVir0029	21048	21926		conserved hypothetical protein	98.6
					AF226280	pVir_plasmid_complete_file		21047	21925	Cjp30	unknown	98.6
CP014746.1	pCJDM67S	31725	32834	Hypothetical protein pVir0029, glutamine-rich	AF226280	pVir_plasmid_complete_file		19929	21050	Cjp29	unknown	96.92
					CP007184	pVir_plasmid_complete_file	YSQ_10165	33079	33645		hypothetical protein	99.27
					CP000550	pVir_plasmid_complete_file	CJJ81176_pVir0028	19930	21051		conserved hypothetical protein	96.92
					CP010074	pVir_plasmid_complete_file	PJ19_09780	25230	26339		hypothetical protein	100
					CP007184	pVir_plasmid_complete_file	YSQ_10170	33678	34193		hypothetical protein	99.21
					CP013734	pVir_plasmid_complete_file	ATE51_05033	21656	22777		hypothetical protein	98.91
					CP001877	pVir_plasmid_complete_file	CJSA_pVir0027	19792	20907		hypothetical protein	99.82
CP014746.1	pCJDM67S	34035	34874	RepE replication protein, putative	CP007184	pVir_plasmid_complete_file	YSQ_09930	22	861		RepE replication protein	98.21
					CP000550	pVir_plasmid_complete_file	CJJ81176_pVir0027	17973	18809		RepE replication protein, putative	95.15
					CP013734	pVir_plasmid_complete_file	ATE51_05032	19606	20445		Initiator Replication protein	97.86
					CP001877	pVir_plasmid_complete_file	CJSA_pVir0026	17850	18671	repE	putative replication protein RepE	94.94
					CP010074	pVir_plasmid_complete_file	PJ19_09775	23367	24203		RepE replication protein	95.15
					AF226280	pVir_plasmid_complete_file		17987	18781	repA		94.69
CP014746.1	pCJDM67S	34891	35520	FIG00470017: hypothetical protein	CP001877	pVir_plasmid_complete_file	CJSA_pVir0025	17183	17812		hypothetical protein	98.1
					AF226280	pVir_plasmid_complete_file		17320	17949	Cjp27	unknown	98.1
					CP013734	pVir_plasmid_complete_file	ATE51_05031	18960	19589		hypothetical protein	99.84
					CP000550	pVir_plasmid_complete_file	CJJ81176_pVir0026	17320	17949		conserved hypothetical protein	98.1
					CP010074	pVir_plasmid_complete_file	PJ19_09770	22714	23343		hypothetical protein	98.1
					CP007184	pVir_plasmid_complete_file	YSQ_09935	878	1507		hypothetical protein	99.84
CP014746.1	pCJDM67S	35530	36207	Plasmid partitioning protein ParA	CP013734	pVir_plasmid_complete_file	ATE51_05030	18282	18950	parA	Chromosome partitioning protein ParA	100
					CP000550	pVir_plasmid_complete_file	CJJ81176_pVir0025	16642	17310		para protein	98.8
					CP007184	pVir_plasmid_complete_file	YSQ_09940	1517	2185		chromosome partitioning protein ParA	100
					AF226280	pVir_plasmid_complete_file		16642	17310	Cjp26	unknown	98.8
					CP010074	pVir_plasmid_complete_file	PJ19_09765	22036	22704		chromosome partitioning protein ParA	98.8
					CP001877	pVir_plasmid_complete_file	CJSA_pVir0024	16505	17173		putative plasmid partioning ParA protein	98.65
